# Supplementary material for: Functional Metagenomic Investigations of Microbial Communities in a Shallow-Sea Hydrothermal System
Source: PLoS One. 2013 Aug 6;8(8):e72958. doi: 10.1371/journal.pone.0072958 (PMC3735525; doi:10.1371/journal.pone.0072958)
Supplement: Table S1 — Geochemical data of sampling sites. (XLS) [file pone.0072958.s005.xls]

## Sheet: Sheet1
Station code	G1	G2
Depth (m)	17.2	0
Temperature (°C)	49	30
DO (%)	29.5	-
DO (μM)	49.2585	-
salinity	32.7784	33.636
Density (σt)	21.648	22.316
pH	4.834	5.925
TA (μmol/kg)	842.253	1468.92
DIC	9466.89	2373.04
NO3-+NO2- (μmol/L)	0.346634	0.810103
NO2- (μmol/L)	0.0570239	0.126407
NH4+ (μmol/L)	0.34	0.01
PO43- (μmol/L)	1.44264	0.0244868
SiO2	98.6458	22.3561
S-2 (mg/L)	0.11	0.01
chl-a (μg/L)	0.187421	0.218874
DOC (μM)	62.1	64.1
CDOM (a300 (m-1))	1.7543	0.49233
CH4(air) (ppmv)	25.02	40.58
CH4(water) (nM)	104174	15976.5
Abbreviations: DO, dissolved oxygen; TA, total alkalinity; DOC, dissolved organic carbon; CDOM, colored dissolved organic matter
