# Supplementary material for: Functional Metagenomic Investigations of Microbial Communities in a Shallow-Sea Hydrothermal System
Source: PLoS One. 2013 Aug 6;8(8):e72958. doi: 10.1371/journal.pone.0072958 (PMC3735525; doi:10.1371/journal.pone.0072958)
Supplement: Table S3 — Selected pair-wise comparisons of SEED subsystems for the shallow-sea and deep-sea hydrothermal fields’ metagenomic datasets. (XLS) [file pone.0072958.s007.xls]

## Sheet: Sheet1
level 1	level 2	level 3*	G1vsG2**	G1vsH1**	G2vsH1**	G1vsH2**	G2vsH2**	H2vsH1**
Motility and Chemotaxis	Bacterial Chemotaxis	Bacterial Chemotaxis				G1
Motility and Chemotaxis	Flagellar motility in Prokaryota	Flagellum	G1		H1	G1		H1
Motility and Chemotaxis	Flagellar motility in Prokaryota	Flagellar motility	G1		H1	G1		H1
Phages, Prophages, Transposable elements, Plasmids	Phages, Prophages	Phage integration and excision		H1	H1			H1
Phages, Prophages, Transposable elements, Plasmids	Gene Transfer Agent (GTA)	Gene Transfer Agent			H1
Virulence, Disease and Defense	Resistance to antibiotics and toxic compounds	Cobalt-zinc-cadmium resistance				H2
Carbohydrates	Polysaccharides	Glycogen metabolism	G1
Carbohydrates	Central carbohydrate metabolism	Pyruvate:ferredoxin oxidoreductase					H2
Carbohydrates	CO2 fixation	CO2 uptake, carboxysome		H1			G2	H1
Cell Wall and Capsule	Gram-Negative cell wall components	LOS core oligosaccharide biosynthesis				G1
Cell Wall and Capsule	Murein Hydrolases	Murein Hydrolases		H1
Cell Wall and Capsule	YjeE	YjeE			H1
Clustering-based subsystems	Glycogen metabolism cluster	Glycogen metabolism cluster	G1
Clustering-based subsystems	Conjugative transfer related cluster	Conjugative transfer related cluster	G1			G1
Clustering-based subsystems	Biosynthesis of galactoglycans and related lipopolysacharides	CBSS-258594.1.peg.3339		H1		H2
Cofactors, Vitamins, Prosthetic Groups, Pigments	Tetrapyrroles	Heme biosynthesis orphans				H2	H2
Cofactors, Vitamins, Prosthetic Groups, Pigments	Quinone cofactors	Menaquinone Biosynthesis via Futalosine					H2
DNA Metabolism	Restriction-Modification System	Restriction-Modification System		H1	H1
DNA Metabolism	Type I Restriction-Modification	Type I Restriction-Modification		H1	H1
DNA Metabolism	CRISPs	CRISPRs			H1
Fatty Acids, Lipids, and Isoprenoids	Polyhydroxybutyrate metabolism	Polyhydroxybutyrate metabolism						H1
Membrane Transport	Protein and nucleoprotein secretion system, Type IV	Conjugative transfer	G1			G1
Membrane Transport	Uni- Sym- and Antiporters	Multi-subunit cation antiporter					G2	H1
Miscellaneous	Plant-Prokaryote DOE project	At4g10620 At3g57180 At3g47450						H1
Miscellaneous	Plant-Prokaryote DOE project	COG3380 COG2907					G2
Miscellaneous	Plant-Prokaryote DOE project	COG0451		H1
Miscellaneous	Plant-Prokaryote DOE project	Iron-sulfur cluster assembly		H1
Nitrogen Metabolism	Denitrification	Denitrification				H2	H2
Protein Metabolism	Protein biosynthesis	rRNAs	G2	H1
Regulation and Cell signaling	Two-component regulatory systems in Campylobacter	Two-component regulatory systems in Campylobacter	G1
Respiration	Electron donating reactions	Respiratory dehydrogenases 1						H1
Respiration	Biogenesis of c-type cytochromes	Biogenesis of c-type cytochromes	G2
Respiration	Electron donating reactions	Succinate dehydrogenase					H2
Respiration	Electron donating reactions	Hydrogenases			H1		H2
Respiration	Electron donating reactions	NiFe hydrogenase maturation			H1
RNA Metabolism	RNA processing and modification	16S rRNA modification within P site of ribosome						H1
Stress Response	Oxidative stress	Glutathione: Biosynthesis and gamma-glutamyl cycle	G2				H1	H1
Stress Response	Oxidative stress	Oxidative stress		H1
*Only the top 10 SEED subsytems each group are shown, which represent relatively more contribution to the differences between the two samples.
**The relatively higher frequency of one subystem between the two samples is indicated by the label in a cell.

## Sheet: Sheet2
Phage integration and excision	1
Flagellar motility	1
Flagellum	1
Multi-subunit cation antiporter	1
16S rRNA modification within P site of ribosome	1
CO2 uptake, carboxysome	1
Glutathione: Biosynthesis and gamma-glutamyl cycle	1
At4g10620 At3g57180 At3g47450	1
Respiratory dehydrogenases 1	1
Polyhydroxybutyrate metabolism	1
Gene Transfer Agent	1
Bacterial Chemotaxis	1
Lipopolysaccharide assembly	1
Lipopolysaccharide-related cluster in Alphaproteobacteria	1
Flagellum in Campylobacter	1
